# Supplementary material
Source: PubMed Central journal article supplement (PMC2893656)

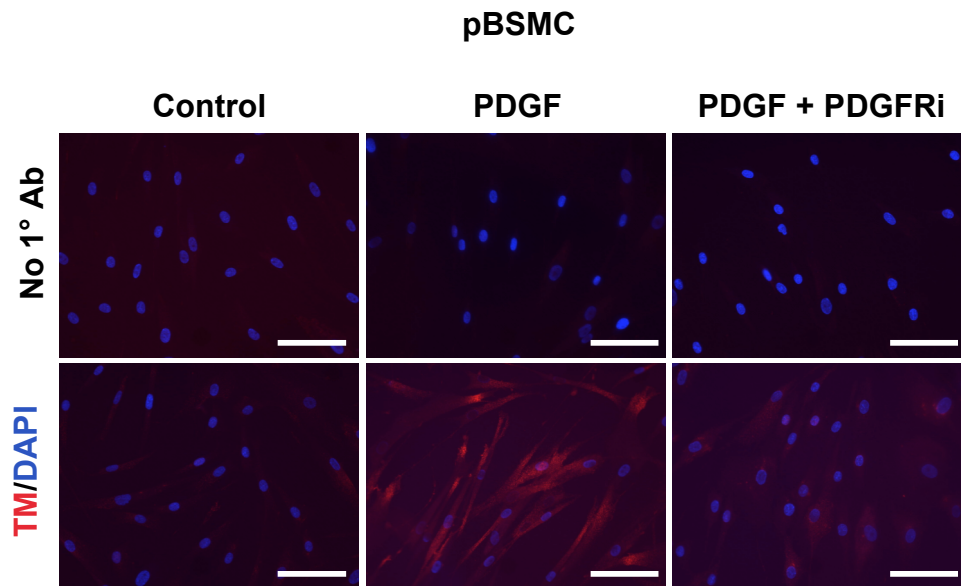

**Supplemental Figure 1**

Supplement: ajpath.2010.090772_1.pdf [file ajpath.2010.090772_1.pdf]
